# Supplementary material for: Effect of parameter choice in root water uptake models – the arrangement of root hydraulic properties within the root architecture affects dynamics and efficiency of root water uptake
Source: Copernicus journal article supplement (doi:10.5194/hess-18-4189-2014), 2014-10-27
Supplement: Supplementary file 1 [file hess-18-4189-2014-supplement.zip]

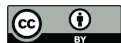

## *Supplement of*

# **Effect of parameter choice in root water uptake models – the arrangement of root hydraulic properties within the root architecture affects dynamics and efficiency of root water uptake**

**M. Bechmann et al.**

*Correspondence to:* M. Bechmann (bechmann.marcel@uni-jena.de)

- Supplement-Cover-Letter.pdf
- Fig1\_HistogramSegmLength.png
- Fig2\_CumL\_Over\_RSoil.png
- Fig3\_Hypothetic\_Effort\_Convex\_Concav.png
- Fig4\_Effort\_lconst\_vs\_nconst.png
- Fig5\_effort\_K\_RS\_correl.png
